# Supplementary material
Source: publisher figshare collection journal article supplement (https://frontiersin.figshare.com/ndownloader/files/12800882)

Average Relative Percentage Bias of the Parameter Estimates with the Assumption of Homogeneity of Covariance Matrices for Multiple-Endpoint Studies

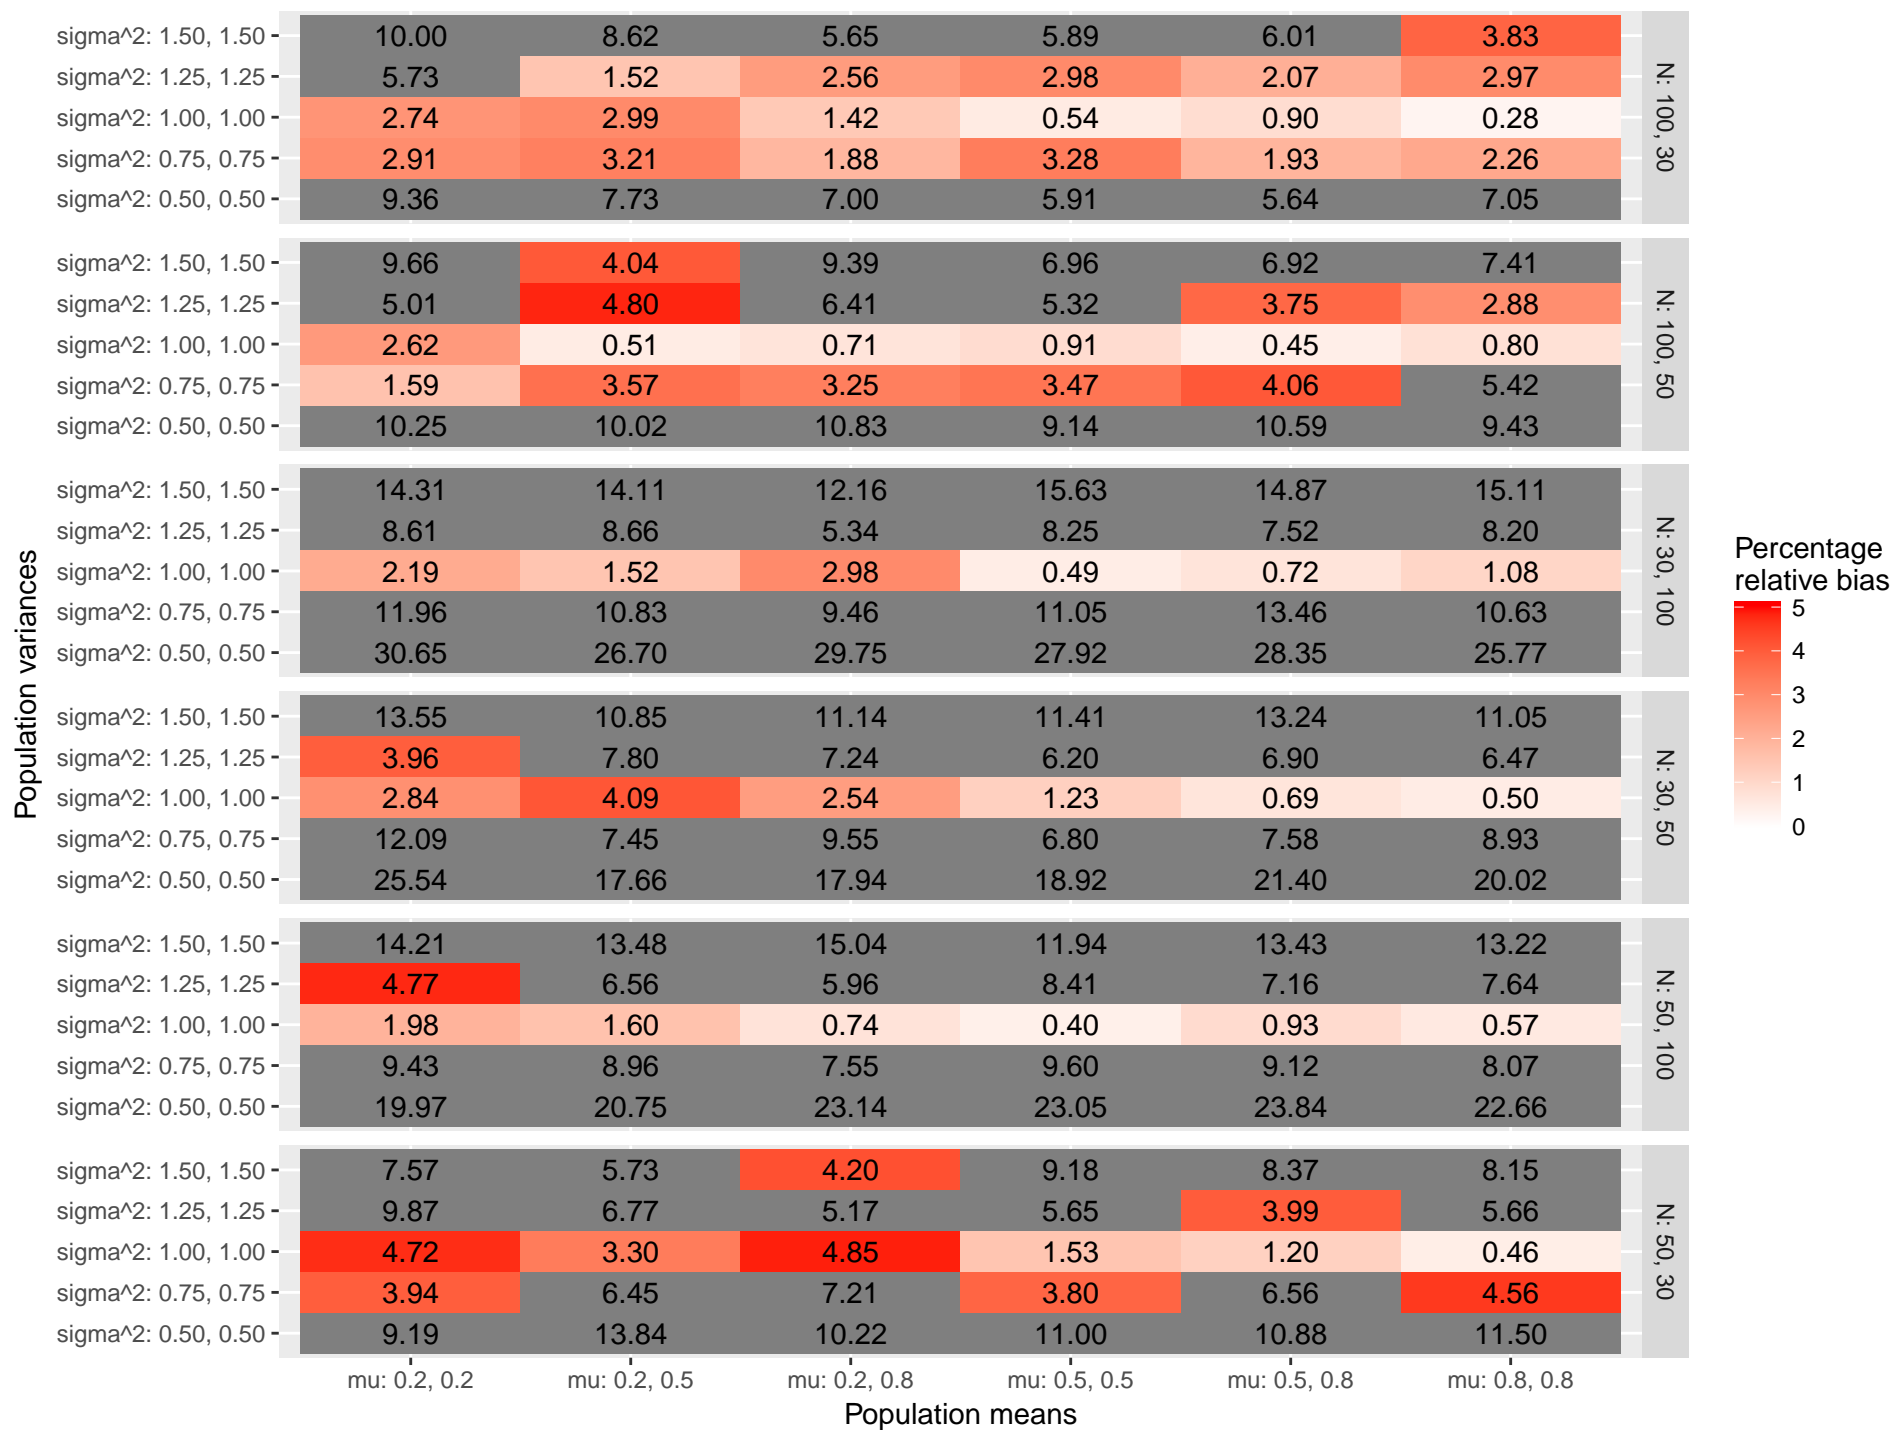

Average Relative Percentage Bias of the Parameter Estimates without the Assumption of Homogeneity of Covariance Matrices for Multiple-Endpoint Studies

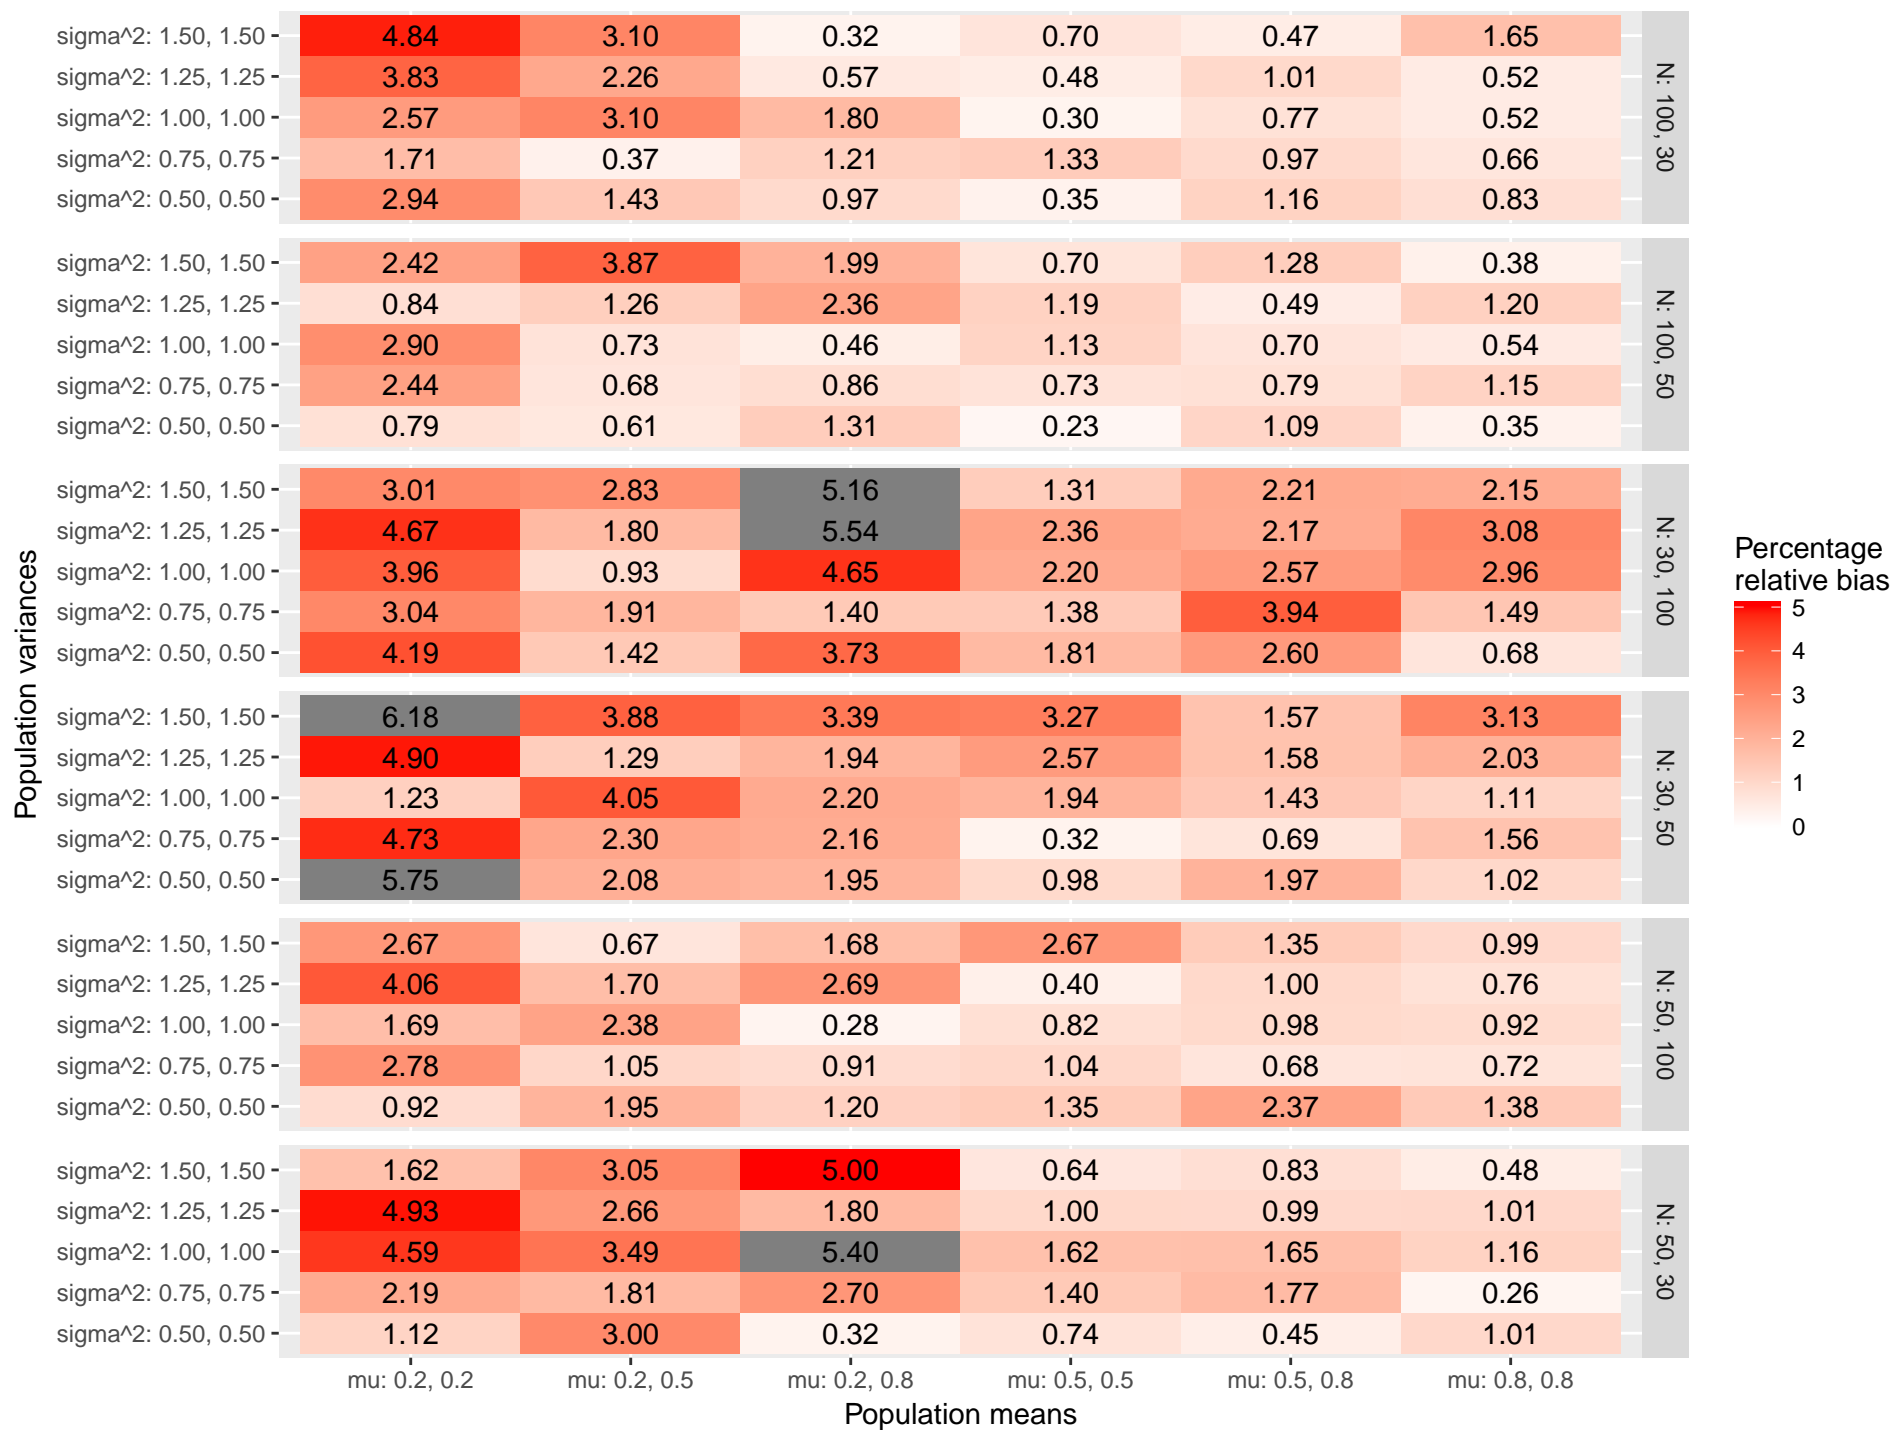

Average Relative Percentage Bias of the Sampling Variances (and Covariances)  
with the Assumption of Homogeneity of Covariance Matrices for Multiple-Endpoint Studies

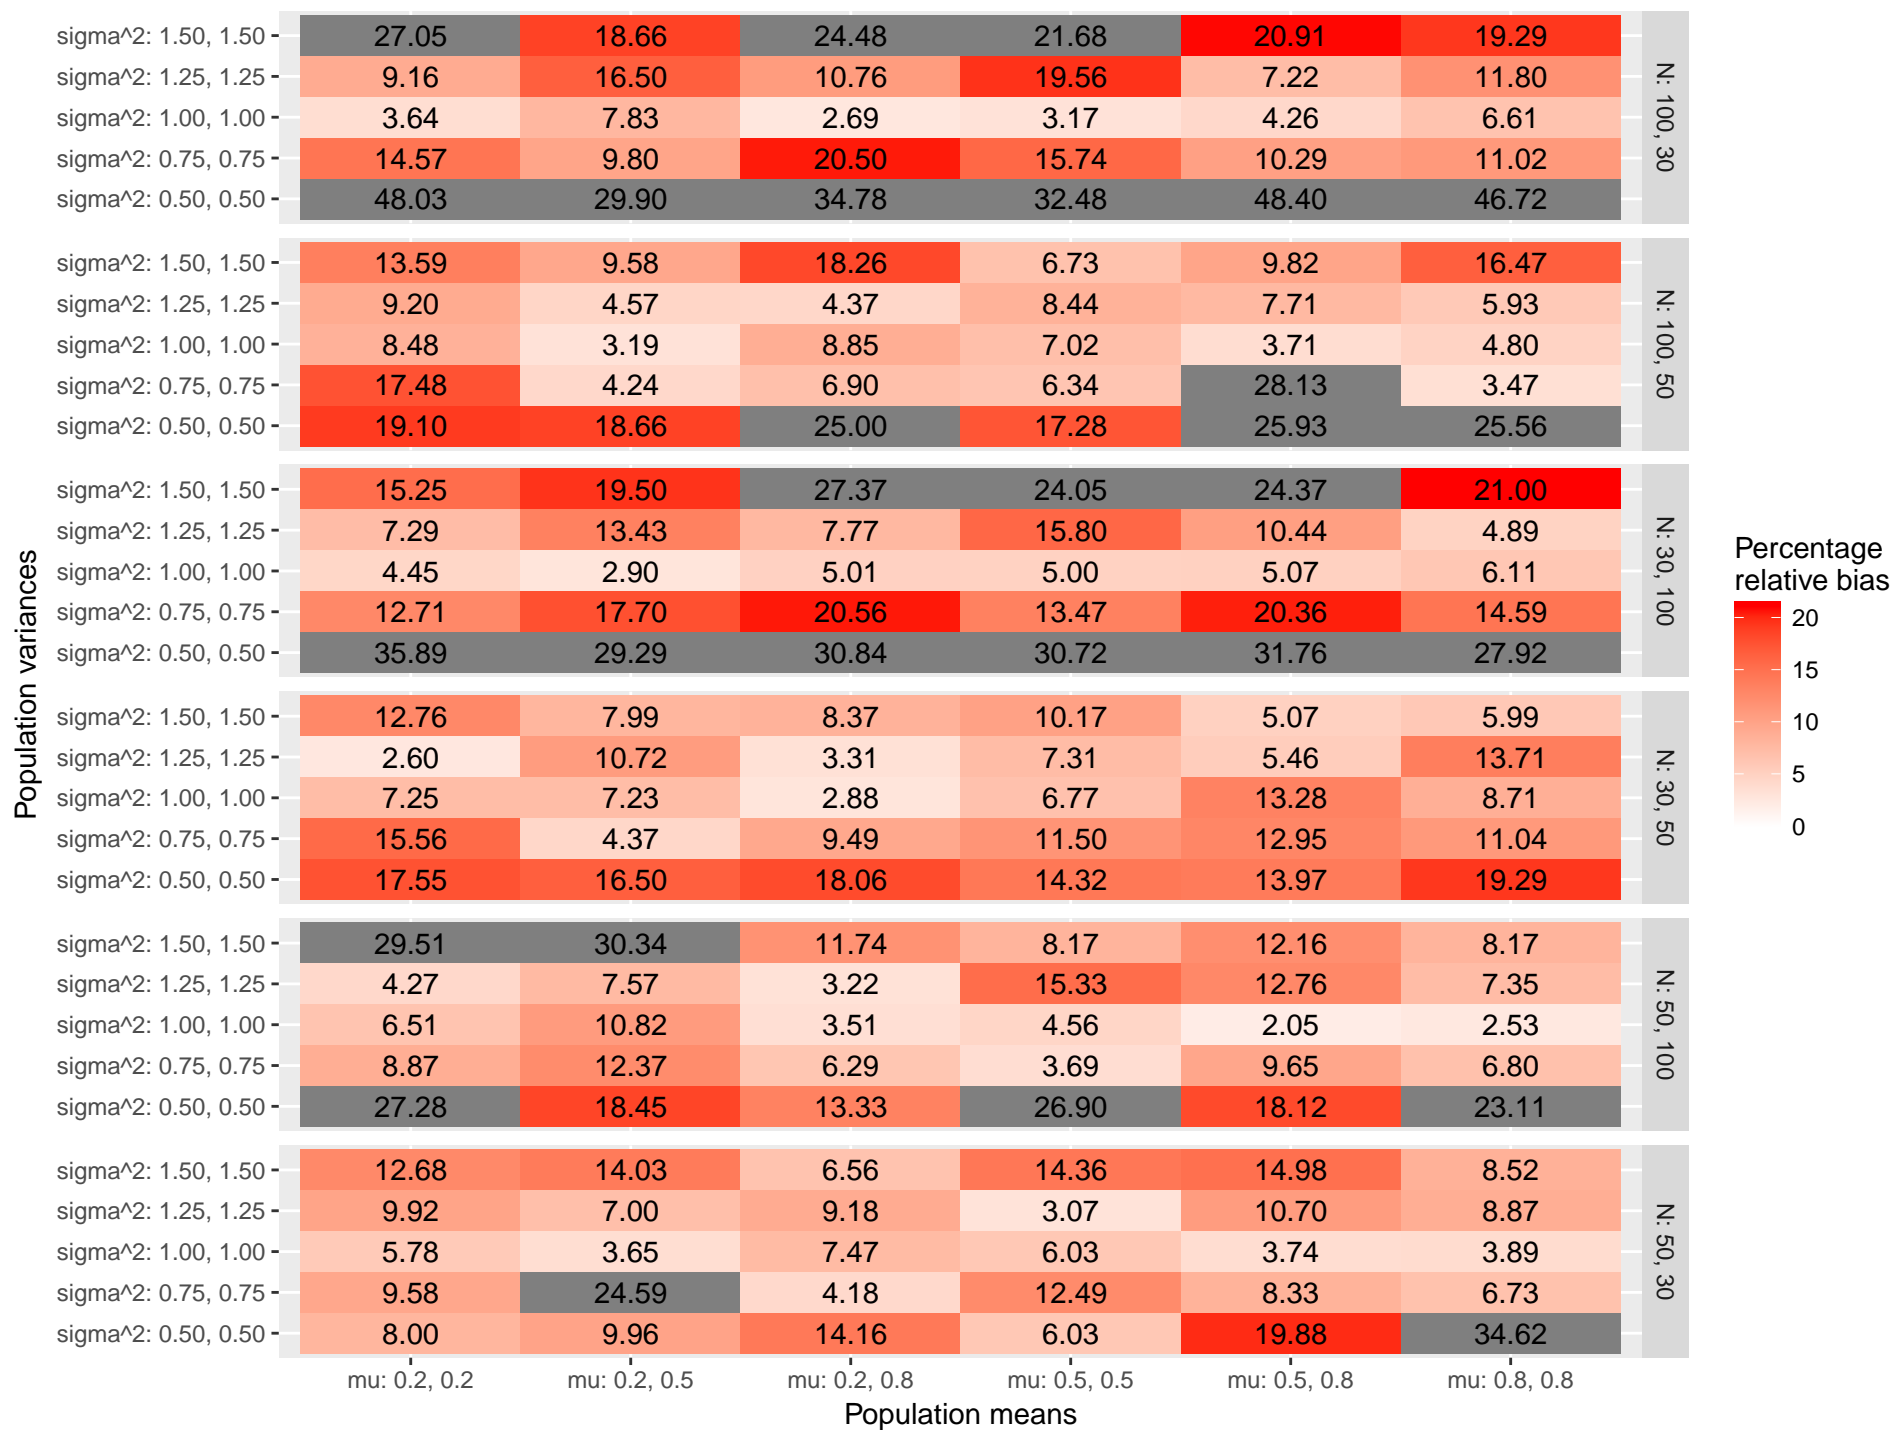

Average Relative Percentage Bias of the Sampling Variances (and Covariances)  
without the Assumption of Homogeneity of Covariance Matrices for Multiple-Endpoint Studies

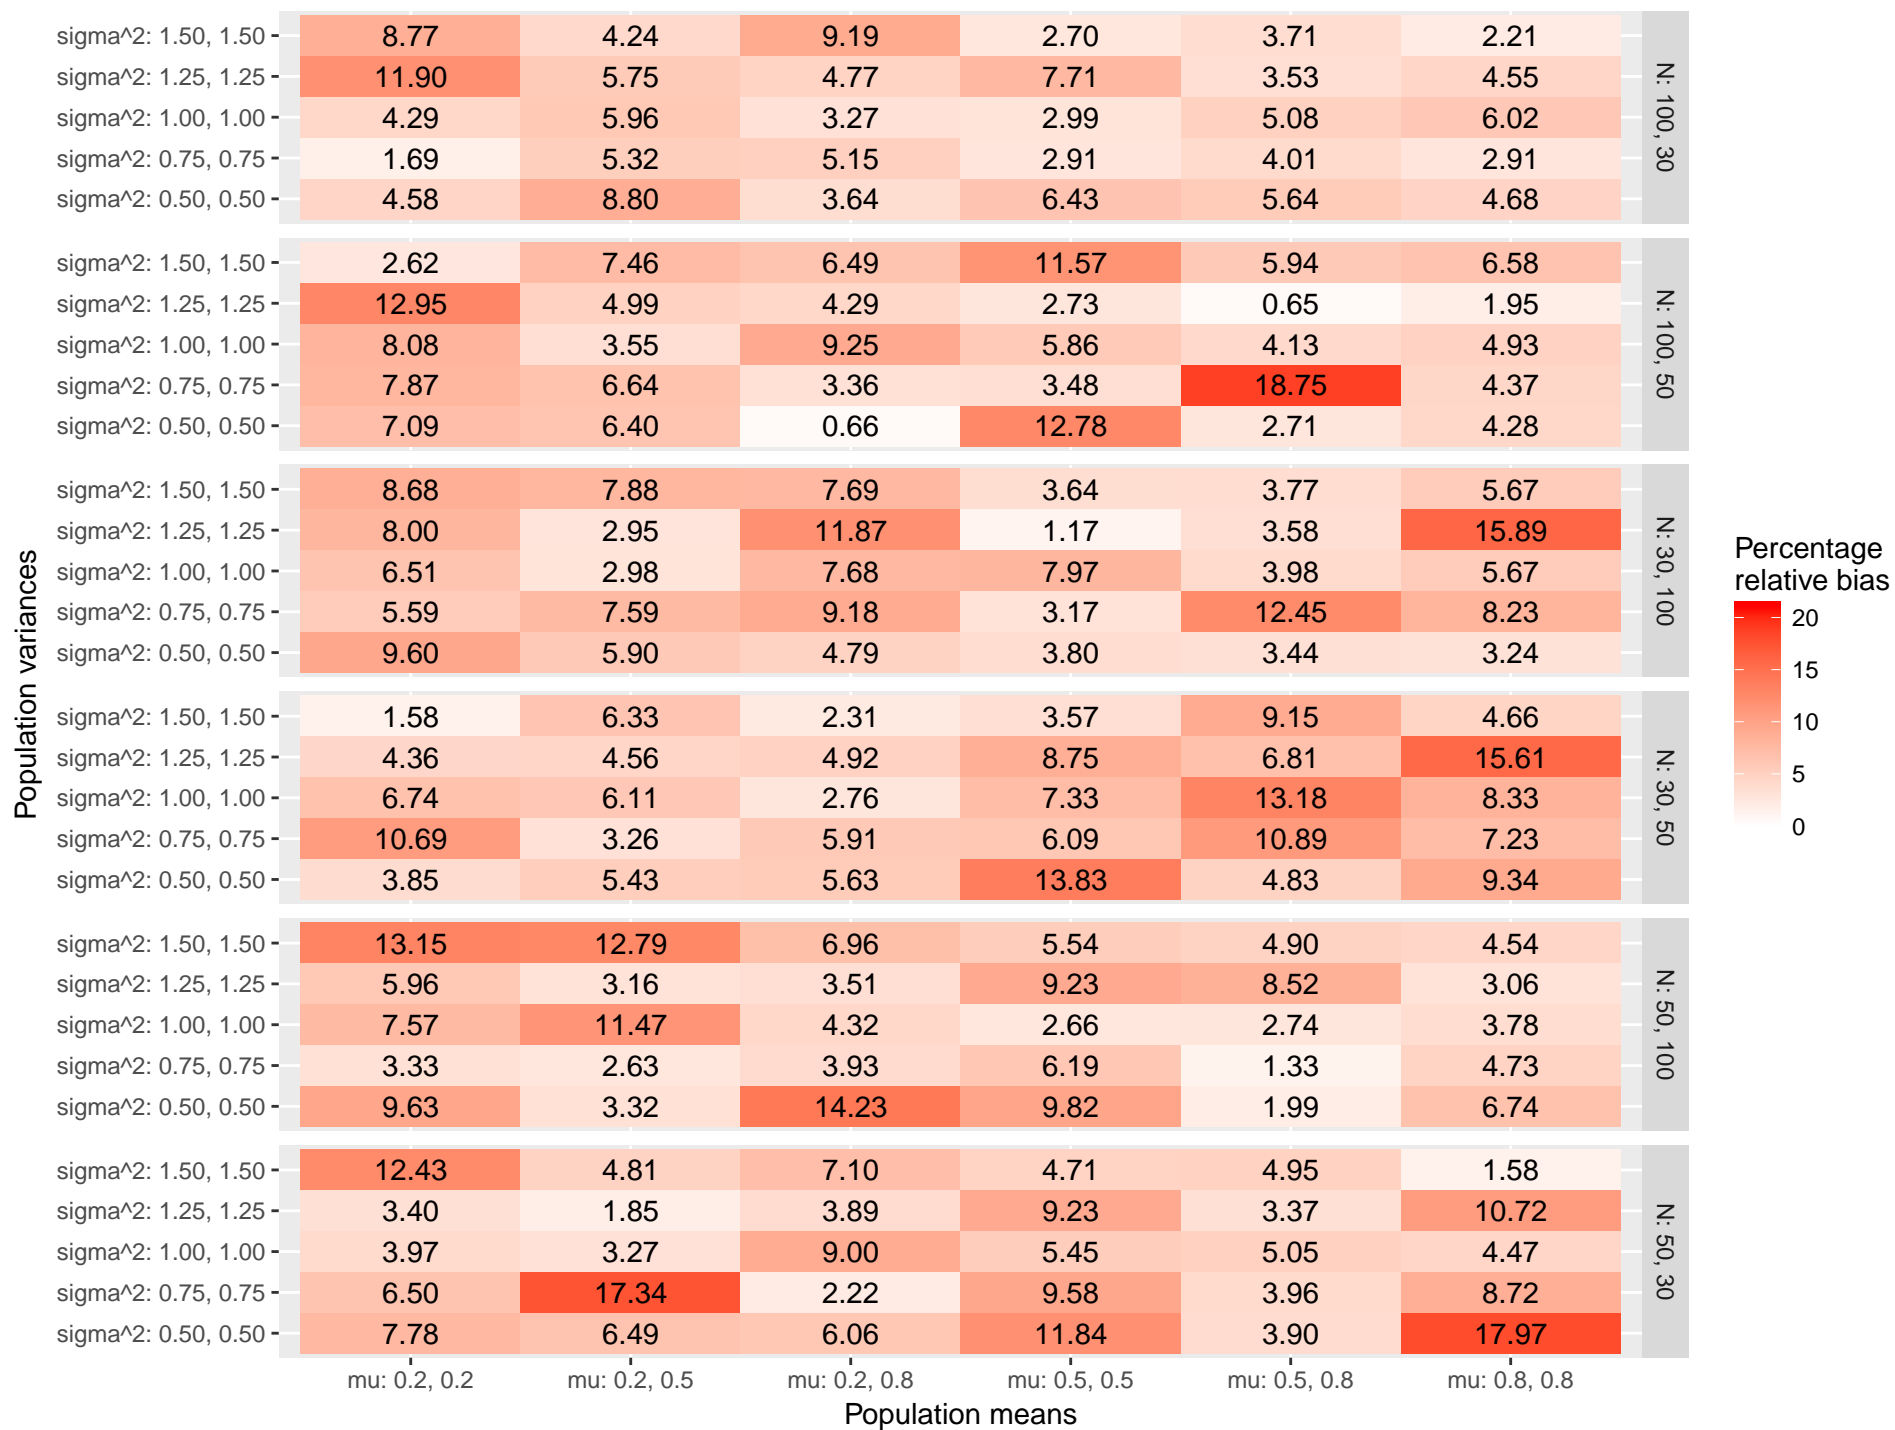

Supplement: Supplementary file [file 12800882]
